# Supplementary material
Source: MDPI journal article supplement (https://www.mdpi.com/2077-1312/10/3/438)
Supplement: s1 [file s1 › jmse-1592508-supplementary.pdf]

Article

# Revisiting the Carbonate Chemistry of the Sea of Japan (East Sea): from Water Column to Sediment

Pavel Tishchenko <sup>1\*</sup>, Jing Zhang <sup>2</sup>, Galina Pavlova <sup>1</sup>, Petr Tishchenko <sup>1</sup>, Sergey Sagalaev <sup>1</sup>, Mariya Shvetsova <sup>1</sup>

<sup>1</sup> V.I. Il'ichev Pacific Oceanological Institute, Far Eastern Branch, Russian Academy of Sciences, 690041 Vladivostok, Russia; pavlova@poi.dvo.ru (G.P.); eq15@poi.dvo.ru (P.T.); sagalaev@poi.dvo.ru (S.S.); chipers@rambler.ru (M.S.)

<sup>2</sup> Faculty of Science, University of Toyama 3190 Gofuku, Toyama, 930-8555, Toyama, Japan; jzhang@sci.u-toyama.ac.jp (J.Z.)

\* Correspondence: tpavel@poi.dvo.ru; Tel.: +7-423-231-3092

**Citation:** Tishchenko, P.; Zhang, J.; Pavlova, G.; Tishchenko, P.; Sagalaev, S.; Shvetsova, M. Revisiting the Carbonate Chemistry of the Sea of Japan (East Sea): from Water Column to Sediment. *J. Mar. Sci. Eng.* **2022**, *10*, 438. <https://doi.org/10.3390/jmse10030438>

Academic Editors: George Kontakiotis and Weidong Zhai

Received: 26 January 2022

Accepted: 10 March 2022

Published: 18 March 2022

**Publisher's Note:** MDPI stays neutral with regard to jurisdictional claims in published maps and institutional affiliations.

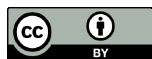

**Copyright:** © 2022 by the authors. Licensee MDPI, Basel, Switzerland. This article is an open access article distributed under the terms and conditions of the Creative Commons Attribution (CC BY) license (<https://creativecommons.org/licenses/by/4.0/>).

**Table S1.** Calcium (mmol/kg) and ammonium (μM) in porewater of sediments of JES, obtained on a board of R/V Hakuho Maru at June – July 2010.

| St. <sup>1)</sup> | cmbsf <sup>2)</sup> | Depth, m | T, °C | S, ‰   | Ca, mmol/kg | NH <sub>4</sub> , μM |
|-------------------|---------------------|----------|-------|--------|-------------|----------------------|
| CR02              | 0                   | 3549     | 0.327 | 34.070 | 10.01       | 0.37                 |
| CR02              | 2                   | 3549     | 0.327 | 34.070 | 9.97        | 38.98                |
| CR02              | 3.5                 | 3549     | 0.327 | 34.070 | 10.10       | 11.91                |
| CR02              | 7                   | 3549     | 0.327 | 34.070 | 10.12       | 9.20                 |
| CR14              | 0                   | 2652     | 0.300 | 34.070 | 10.01       | 0.09                 |
| CR14              | 1.5                 | 2652     | 0.300 | 34.070 | 10.10       | 17.32                |
| CR14              | 4.5                 | 2652     | 0.300 | 34.070 | 10.03       | 19.49                |
| CR14              | 7.5                 | 2652     | 0.300 | 34.070 | 10.06       | 14.62                |
| CR14              | 10.5                | 2652     | 0.300 | 34.070 | 9.97        | 9.74                 |
| CR14              | 13.5                | 2652     | 0.300 | 34.070 | 9.97        | 14.08                |
| CR14              | 16.5                | 2652     | 0.300 | 34.070 | 9.88        | 23.82                |
| CR14              | 19.5                | 2652     | 0.300 | 34.070 | 10.20       | 21.11                |
| CR14              | 22.5                | 2652     | 0.300 | 34.070 | 10.05       | 12.99                |
| CR14              | 25.5                | 2652     | 0.300 | 34.070 | 9.91        | 21.65                |
| CR14              | 28.5                | 2652     | 0.300 | 34.070 | 9.92        | 23.28                |
| CR14              | 31.5                | 2652     | 0.300 | 34.070 | 9.89        | 23.28                |
| CR14              | 34.5                | 2652     | 0.300 | 34.070 | 9.91        | 22.74                |
| CR14              | 37.5                | 2652     | 0.300 | 34.070 | 10.04       | 21.65                |
| CR14              | 40.5                | 2652     | 0.300 | 34.070 | 9.85        | 34.11                |
| CR34              | 0                   | 554      | 0.484 | 34.072 | 10.01       | 0.18                 |
| CR34              | 1.5                 | 554      | 0.484 | 34.072 | 10.07       | 8.46                 |
| CR34              | 4.5                 | 554      | 0.484 | 34.072 | 10.08       | 7.22                 |
| CR34              | 7.5                 | 554      | 0.484 | 34.072 | 10.23       | 10.74                |
| CR34              | 10.5                | 554      | 0.484 | 34.072 | 10.03       | 18.16                |
| CR34              | 13.5                | 554      | 0.484 | 34.072 | 10.06       | 26.80                |
| CR34              | 16.5                | 554      | 0.484 | 34.072 | 10.06       | 22.10                |
| CR34              | 19.5                | 554      | 0.484 | 34.072 | 10.09       | 31.99                |
| CR34              | 22.5                | 554      | 0.484 | 34.072 | 10.09       | 28.53                |
| CR41              | 0                   | 3444     | 0.318 | 34.070 | 10.01       | 0.91                 |
| CR41              | 1.5                 | 3444     | 0.318 | 34.070 | 9.86        | 5.22                 |
| CR41              | 4.5                 | 3444     | 0.318 | 34.070 | 10.04       | 1.68                 |
| CR41              | 7.5                 | 3444     | 0.318 | 34.070 | 9.83        | 3.17                 |
| CR41              | 10.5                | 3444     | 0.318 | 34.070 | 9.93        | 2.72                 |
| CR41              | 13.5                | 3444     | 0.318 | 34.070 | 9.97        | 4.28                 |
| CR41              | 16.5                | 3444     | 0.318 | 34.070 | 9.84        | 8.34                 |
| CR41              | 19.5                | 3444     | 0.318 | 34.070 | 9.97        | 8.52                 |
| CR41              | 22.5                | 3444     | 0.318 | 34.070 | 9.88        | 10.19                |
| CR41              | 25.5                | 3444     | 0.318 | 34.070 | 10.00       | 13.46                |
| CR41              | 28.5                | 3444     | 0.318 | 34.070 | 9.88        | 18.71                |
| CR41              | 31.5                | 3444     | 0.318 | 34.070 | 9.84        | 19.48                |
| CR41              | 34.5                | 3444     | 0.318 | 34.070 | 9.80        | 20.26                |
| CR41              | 37.5                | 3444     | 0.318 | 34.070 | 9.82        | 25.76                |
| CR41              | 40.5                | 3444     | 0.318 | 34.070 | 9.76        | 24.77                |
| CR41              | 43.5                | 3444     | 0.318 | 34.070 | 9.69        | 30.39                |
| CR41              | 46.5                | 3444     | 0.318 | 34.070 | 9.85        | 30.57                |
| CR47              | 0                   | 3614     | 0.333 | 34.070 | 10.01       | 0.15                 |
| CR47              | 1.5                 | 3614     | 0.333 | 34.070 | 9.97        | 10.49                |
| CR47              | 4.5                 | 3614     | 0.333 | 34.070 | 9.88        | 3.05                 |
| CR47              | 7.5                 | 3614     | 0.333 | 34.070 | 9.76        | 4.32                 |
| CR47              | 10.5                | 3614     | 0.333 | 34.070 | 9.85        | 11.29                |
| CR47              | 13.5                | 3614     | 0.333 | 34.070 | 9.76        | 11.20                |
| CR47              | 16.5                | 3614     | 0.333 | 34.070 | 10.01       | 12.49                |
| CR47              | 19.5                | 3614     | 0.333 | 34.070 | 10.03       | 18.65                |

|      |      |      |       |        |       |       |
|------|------|------|-------|--------|-------|-------|
| CR47 | 22.5 | 3614 | 0.333 | 34.070 | 9.79  | 20.01 |
| CR58 | 0    | 2809 | 0.259 | 34.070 | 10.01 | 0.22  |
| CR58 | 1.5  | 2809 | 0.259 | 34.070 | 10.05 | 5.67  |
| CR58 | 7.5  | 2809 | 0.259 | 34.070 | 10.16 | 5.39  |
| CR58 | 10.5 | 2809 | 0.259 | 34.070 | 10.19 | 5.52  |
| CR58 | 13.5 | 2809 | 0.259 | 34.070 | 10.21 | 17.17 |
| CR58 | 16.5 | 2809 | 0.259 | 34.070 | 10.24 | 21.93 |

<sup>1)</sup> St. means station number; <sup>2)</sup> cmbsf means depth below seafloor in centimeter.

**Table S2** Phosphorus and silica modeled concentrations (μM) in porewater of sediments of JES, obtained on a board of R/V Hakuho Maru at June – July 2010.

| St. <sup>1)</sup> | cmbsf <sup>2)</sup> | Depth, m | T, °C | S, ‰   | [P], μM | Si, μM |
|-------------------|---------------------|----------|-------|--------|---------|--------|
| CR02              | 0                   | 3549     | 0.327 | 34.070 | 2.02    | 90.44  |
| CR02              | 2                   | 3549     | 0.327 | 34.070 | 4.44    | 136.78 |
| CR02              | 3.5                 | 3549     | 0.327 | 34.070 | 2.74    | 104.29 |
| CR02              | 7                   | 3549     | 0.327 | 34.070 | 2.58    | 101.04 |
| CR14              | 0                   | 2652     | 0.300 | 34.070 | 2.01    | 90.11  |
| CR14              | 1.5                 | 2652     | 0.300 | 34.070 | 3.08    | 110.78 |
| CR14              | 4.5                 | 2652     | 0.300 | 34.070 | 3.22    | 113.39 |
| CR14              | 7.5                 | 2652     | 0.300 | 34.070 | 2.91    | 107.54 |
| CR14              | 10.5                | 2652     | 0.300 | 34.070 | 2.61    | 101.69 |
| CR14              | 13.5                | 2652     | 0.300 | 34.070 | 2.88    | 106.90 |
| CR14              | 16.5                | 2652     | 0.300 | 34.070 | 3.49    | 118.58 |
| CR14              | 19.5                | 2652     | 0.300 | 34.070 | 3.32    | 115.33 |
| CR14              | 22.5                | 2652     | 0.300 | 34.070 | 2.81    | 105.59 |
| CR14              | 25.5                | 2652     | 0.300 | 34.070 | 3.35    | 115.98 |
| CR14              | 28.5                | 2652     | 0.300 | 34.070 | 3.46    | 117.94 |
| CR14              | 31.5                | 2652     | 0.300 | 34.070 | 3.46    | 117.94 |
| CR14              | 34.5                | 2652     | 0.300 | 34.070 | 3.42    | 117.29 |
| CR14              | 37.5                | 2652     | 0.300 | 34.070 | 3.35    | 115.98 |
| CR14              | 40.5                | 2652     | 0.300 | 34.070 | 4.13    | 130.93 |
| CR34              | 0                   | 554      | 0.484 | 34.072 | 1.71    | 90.22  |
| CR34              | 1.5                 | 554      | 0.484 | 34.072 | 2.23    | 100.15 |
| CR34              | 4.5                 | 554      | 0.484 | 34.072 | 2.15    | 98.66  |
| CR34              | 7.5                 | 554      | 0.484 | 34.072 | 2.37    | 102.89 |
| CR34              | 10.5                | 554      | 0.484 | 34.072 | 2.84    | 111.79 |
| CR34              | 13.5                | 554      | 0.484 | 34.072 | 3.38    | 122.16 |
| CR34              | 16.5                | 554      | 0.484 | 34.072 | 3.08    | 116.52 |
| CR34              | 19.5                | 554      | 0.484 | 34.072 | 3.70    | 128.39 |
| CR34              | 22.5                | 554      | 0.484 | 34.072 | 3.48    | 124.24 |
| CR41              | 0                   | 3444     | 0.318 | 34.070 | 0.91    | 91.09  |
| CR41              | 1.5                 | 3444     | 0.318 | 34.070 | 5.22    | 96.26  |
| CR41              | 4.5                 | 3444     | 0.318 | 34.070 | 1.68    | 92.02  |
| CR41              | 7.5                 | 3444     | 0.318 | 34.070 | 3.17    | 93.80  |
| CR41              | 10.5                | 3444     | 0.318 | 34.070 | 2.72    | 93.26  |
| CR41              | 13.5                | 3444     | 0.318 | 34.070 | 4.28    | 95.14  |
| CR41              | 16.5                | 3444     | 0.318 | 34.070 | 8.34    | 100.01 |
| CR41              | 19.5                | 3444     | 0.318 | 34.070 | 8.52    | 100.22 |
| CR41              | 22.5                | 3444     | 0.318 | 34.070 | 10.19   | 102.23 |
| CR41              | 25.5                | 3444     | 0.318 | 34.070 | 13.46   | 106.15 |
| CR41              | 28.5                | 3444     | 0.318 | 34.070 | 18.71   | 112.45 |
| CR41              | 31.5                | 3444     | 0.318 | 34.070 | 19.48   | 113.38 |
| CR41              | 34.5                | 3444     | 0.318 | 34.070 | 20.26   | 114.31 |
| CR41              | 37.5                | 3444     | 0.318 | 34.070 | 25.76   | 120.91 |
| CR41              | 40.5                | 3444     | 0.318 | 34.070 | 24.77   | 119.72 |
| CR41              | 43.5                | 3444     | 0.318 | 34.070 | 30.39   | 126.47 |

|      |      |      |       |        |       |        |
|------|------|------|-------|--------|-------|--------|
| CR41 | 46.5 | 3444 | 0.318 | 34.070 | 30.57 | 126.68 |
| CR47 | 0    | 3614 | 0.333 | 34.070 | 0.15  | 90.18  |
| CR47 | 1.5  | 3614 | 0.333 | 34.070 | 10.49 | 102.59 |
| CR47 | 4.5  | 3614 | 0.333 | 34.070 | 3.05  | 93.66  |
| CR47 | 7.5  | 3614 | 0.333 | 34.070 | 4.32  | 95.18  |
| CR47 | 10.5 | 3614 | 0.333 | 34.070 | 11.29 | 103.55 |
| CR47 | 13.5 | 3614 | 0.333 | 34.070 | 11.20 | 103.44 |
| CR47 | 16.5 | 3614 | 0.333 | 34.070 | 12.49 | 104.99 |
| CR47 | 19.5 | 3614 | 0.333 | 34.070 | 18.65 | 112.38 |
| CR47 | 22.5 | 3614 | 0.333 | 34.070 | 20.01 | 114.01 |
| CR58 | 0    | 2809 | 0.259 | 34.070 | 0.22  | 90.26  |
| CR58 | 1.5  | 2809 | 0.259 | 34.070 | 5.67  | 96.80  |
| CR58 | 7.5  | 2809 | 0.259 | 34.070 | 5.39  | 96.47  |
| CR58 | 10.5 | 2809 | 0.259 | 34.070 | 5.52  | 96.62  |
| CR58 | 13.5 | 2809 | 0.259 | 34.070 | 17.17 | 110.60 |
| CR58 | 16.5 | 2809 | 0.259 | 34.070 | 21.93 | 116.32 |

<sup>1)</sup> St. means station number; <sup>2)</sup> cmbsf means depth below seafloor in centimeter.

Taking into account the effect of variability of major ions on dissociation constants

Stoichiometric (apparent) constants are used to calculate the carbonate system parameters in seawater and marine pore waters [1]; the major parameters of the carbonate system being *pH*, *TA* (Total Alkalinity), *DIC* (Dissolved Inorganic Carbon), *pCO<sub>2</sub>* (partial pressure of CO<sub>2</sub>),  $\Omega_c$ , and  $\Omega_a$  (saturation degree of seawater with respect to calcite and aragonite, respectively). The effect of the composition of the ionic medium on the stoichiometric constants of carbonic acid and carbonate minerals can be taken into account by empirical equations relating the values of the stoichiometric constants to the prevailing salinity [2]. Such simplification is possible because concentrations of major constituents of seawater exhibit an almost constant ratio to one another throughout the oceans. However, relative concentrations of major constituents are widely variable in pore waters of marine sediments due to diagenetic processes occurring in these often anoxic environments (sulfate reduction, mineral dissolution, and precipitation). Therefore, dissociation constants obtained in seawater, strictly to say, cannot be applied for the description of chemical equilibria in anoxic marine sediments and other seawater environments with anomalous major ion concentrations as it was noted elsewhere [3,4]. An alternative approach is available for the description of chemical equilibria in natural waters of any composition [5–8], it is based on the Pitzer method [9,10].

Here, it is suggested to use a combined approach for the description of the carbonate system in anoxic sediments and in other marine environments with unusual seawater compositions. First of all, it is suggested to use commonly accepted stoichiometric constants of the carbonate system in seawater [2]. Secondly, it is suggested to correct using a constant the additional terms that take into account variations of the concentrations of sulfate, alkalinity, calcium, and magnesium prevailing in the investigated fluids. Applying the Pitzer approach, empirical relations were derived, which can be used to calculate these terms and, thus, reliable stoichiometric equilibrium constants for anoxic marine sediments.

#### Pitzer method

The basic equations of the ion-interaction model have been presented and discussed in several publications [9,10]. The model starts with a virial expansion of the excess free energy,  $G^{ex}$ , of the solution. The expressions for osmotic and activity coefficients are obtained by appropriate derivatives of free energy with respect to the weight of the solution,  $n_w$ , and molality of the component,  $m_i$ , respectively. Equations (1S)–(4S) give the expressions for the osmotic coefficient and activity coefficients of cations M, anions X, and neutral species, respectively.

$$\begin{aligned}
(\phi-1) = & -\frac{\partial G^{\text{ex}} / \partial n_w}{RT \Sigma m_i} = (2 / \Sigma m_i) [-A^\phi I^{3/2} / (1 + 1.2 I^{1/2}) + \Sigma \Sigma m_c m_a (B_{ca}^\phi + ZC_{ca}) \\
& + 1 / 2 \Sigma \Sigma m_c m_c (\Phi_{cc}^\phi + \Sigma m_a \psi_{cca}) + 1 / 2 \Sigma \Sigma m_a m_a (\Phi_{aa}^\phi + \Sigma m_c \psi_{aac}) + \Sigma \Sigma m_n m_c \lambda_{nc} + \\
& \Sigma \Sigma m_n m_a \lambda_{na} + 1 / 2 \Sigma \Sigma m_n m_n \lambda_{nn} + 1 / 2 \Sigma m_n^2 \lambda_{nn} + \Sigma \Sigma \Sigma m_c m_a m_n \zeta_{can}] \quad (\text{S1})
\end{aligned}$$

$$\begin{aligned}
\ln \gamma_M = & \frac{1}{RT} \frac{\partial G^{\text{ex}}}{\partial m_M} = z_M^2 F + \Sigma m_a (2B_{Ma} + ZC_{Ma}) + \Sigma m_c (2\Phi_{Mc} + \Sigma m_a \psi_{Mca}) \\
& + 1 / 2 \Sigma m_a m_a \psi_{Maa} + z_M \Sigma \Sigma m_c m_a C_{ca} + 2 \Sigma m_n \lambda_{nM} + \Sigma \Sigma m_n m_a \zeta_{Man} \quad (\text{S2})
\end{aligned}$$

$$\begin{aligned}
\ln \gamma_X = & \frac{1}{RT} \frac{\partial G^{\text{ex}}}{\partial m_X} = z_X^2 F + \Sigma m_c (2B_{Xc} + ZC_{Xc}) + \Sigma m_a (2\Phi_{Xa} + \Sigma m_c \psi_{Xac}) \\
& + 1 / 2 \Sigma m_c m_c \psi_{Xcc} + |z_M| \Sigma \Sigma m_c m_a C_{ca} + 2 \Sigma m_n \lambda_{nX} + \Sigma \Sigma m_n m_c \zeta_{Xcn} \quad (\text{S3})
\end{aligned}$$

$$\ln \gamma_n = 2m_n \lambda_{n,n} + 2 \Sigma m_c \lambda_{n,c} + 2 \Sigma m_a \lambda_{n,a} + \Sigma \Sigma m_c m_a \zeta_{n,c,a} \quad (\text{S4})$$

The parameters appearing in Equations (1S)–(4S) are defined as follows:

$$F = f^\gamma + \Sigma \Sigma m_c m_a B_{ca}' + \Sigma \Sigma m_c m_c \Phi_{cc}' + \Sigma \Sigma m_a m_a \Phi_{aa}' \quad (\text{S5})$$

$$f^\gamma = -A^\phi \cdot \left[ I^{1/2} / (1 + 1.2 \cdot I^{1/2}) + \frac{2}{1.2} \cdot \ln(1 + 1.2 \cdot I^{1/2}) \right] \quad (\text{S6})$$

$$B_{MX} = \beta_{MX}^0 + \beta_{MX}^1 \cdot g(\alpha_1 I^{1/2}) + \beta_{MX}^2 \cdot g(\alpha_2 I^{1/2}) \quad (\text{S7})$$

$$g = 2[1 - (1 + x) \exp(-x)] / x^2 \quad (\text{S8})$$

$$Z = \Sigma m_i |z_i| \quad (\text{S9})$$

$$B_{ca}^\phi = B_{ca} + IB_{ca}' \quad (\text{S10})$$

$$\Phi_{cc}^\phi = \Phi_{cc} + I\Phi_{cc}' \quad (\text{S11})$$

Here “a”, “c”, and “n” are cations, anions, and neutral species, respectively.  $A^\phi$  is the Debye–Hueckel limiting slope with numerical values calculated according to an empirical equation suggested by Clegg and Whitfield [7]. For non-associated electrolytes  $\alpha_1$  and  $\alpha_2$  take values of 2 and 0, respectively, whereas for 2-2 electrolytes the optimized values of  $\alpha_1$  and  $\alpha_2$  are 1.4 and 12 kg<sup>1/2</sup> mol<sup>-1/2</sup>, respectively.  $B'$  and  $\Phi'$  are the ionic strength derivatives of  $B$  and  $\Phi$ ,  $I$  is ionic strength, and  $\beta_{MX}^0$ ,  $\beta_{MX}^1$ ,  $\beta_{MX}^2$ ,  $C_{MX}$ ,  $\Phi_{ij}$ ,  $\psi_{ijk}$ ,  $\lambda_{ni}$ ,  $\xi_{nca}$  are measurable empirical constants (Pitzer parameters). Note that in equations (1S)–(4S) non-measurable terms containing virial coefficients of individual ions are omitted. Fortunately, these terms cancel out for electro-neutral combinations of ions and therefore have no effect on the calculations carried out below. In our calculations, we assumed that the original composition of pore waters

prior to diagenetic alteration is the same as in seawater (Table S3). Pitzer parameters applied in our calculations were taken from the literature, which is listed in Tables S4 and S5.

The Pitzer method treats strong electrolytes as fully dissociated in solution. In this case, the Pitzer parameters are derived from measurable non-ideal properties such as mean activity coefficients of salts, osmotic coefficients, heat dilutions, and capacity heats. However, when species reveal strong interactions in the solutions (weak acids, poor soluble salts, formation of complexes between ions) then appropriate accurate Pitzer parameters cannot be derived from experimental data due to the fact that species cannot coexist anymore with each other under moderate concentrations. For such strong interactions, the Pitzer and ion-pairing models are complementary as demonstrated by Whitfield [8,10–12]. These are interactions between hydrogen and sulfate ions and between carbonate anions and calcium and magnesium cations, respectively. The “free” activity coefficients of hydrogen and carbonate ions  $((\gamma_H)_f, (\gamma_{CO_3})_f)$  were calculated using equations (2S) and (3S) without taking into account the strong and specific interactions. The “total” activity coefficients were then obtained by the following relations:

$$\gamma_H = (\gamma_H)_f / (1 + m_{SO_4} / K_{HSO_4}^*) \quad (S12)$$

$$\gamma_{CO_3} = (\gamma_{CO_3})_f / (1 + m_{Ca} / K_{CaCO_3}^* + m_{Mg} / K_{MgCO_3}^*) \quad (S13)$$

where  $K_{HSO_4}^*$  is the stoichiometric dissociation constant of  $HSO_4^-$  in seawater [13]. Thermodynamic stability constants ( $K_{MX}$ ) for ion pairs of  $CaCO_3$  [14] and  $MgCO_3$  [8] were converted into stoichiometric constants valid for seawater ( $K_{MX}^*$ ) applying the following equation:

$$K_{MX}^* = K_{MX} (\gamma_M \gamma_X / \gamma_{MX}) \quad (S14)$$

#### *Effect of Pore Water Composition on Carbonate System Constants*

Early diagenetic processes significantly change the composition of pore waters. The concentrations of major ions are strongly affected by sulfate reduction, formation/dissociation of carbonate minerals, formation of clay minerals, and ionic exchange [15]. Microbiological oxidation of organic matter or methane by sulfate consumes sulfate ions and produces an equivalent amount of dissolved bicarbonate. Formation/dissociation of carbonate minerals changes calcium, magnesium, and bicarbonate concentrations in pore waters. Dissolved magnesium is also bound in clay minerals and other authigenic silicate phases formed during the alteration of volcanic ash and oceanic basement [16,17]. Moreover, the weathering of silicates in anoxic marine sediments may affect the calcium and bicarbonate concentrations [18]. Due to charge balance constraints, the variations of these ion concentrations are not independent, but follow the relation:

$$2 \cdot \Delta m_{SO_4} + \Delta m_{HCO_3} = 2 \cdot \Delta m_{Ca} + 2 \cdot \Delta m_{Mg} \quad (S15)$$

The dissociation constants of carbonic acid and solubility products of calcium carbonates in a large number of different pore waters with variable compositions were evaluated. In these calculations, the concentrations of dissolved sulfate and Ca were diminished and the total alkalinity increased following the stoichiometry and charge balance constraints defined above. Moreover, the reduced concentration of dissolved Mg was explored for the effects of Mg concentrations on the stability constants. Finally, the salinities of the pore fluids were varied between 30 and 40 and the temperatures between 0° and 30°C.

For each of the generated pore fluid compositions, the activity coefficients of  $CO_2$ ,  $H^+$ ,  $HCO_3^-$ ,  $CO_3^{2-}$ ,  $Ca^{+2}$  and  $a_{H_2O}$  was calculated using the Pitzer approach. Moreover, the logarithms of the non-ideal part of the stoichiometric dissociation con-

stants of carbonic acid ( $K_{1sw}^*$  and  $K_{2sw}^*$ ) and the ionic products of calcium carbonate ( $IP_{sw}$ ) for sea water were evaluated which are defined by the following equations

$$\log(k_1) = \log(K_{1sw}^*) - \log(K_1^o) - \log(1 - S/1000) \quad (S16)$$

$$\log(k_2) = \log(K_{2sw}^*) - \log(K_2^o) - \log(1 - S/1000) \quad (S17)$$

$$\log(k_s) = \log(IP_{sw}) - \log(IP_{sw}^o) - \log(1 - S/1000) \quad (S18)$$

Calculated activity coefficients and  $k$  - values were combined into  $\Delta \log K$  values, which can be used to determine stability constants valid for anoxic pore fluids:

$$\Delta \log(K_1) = \log(\gamma_{CO_2}) + \log(a_{H_2O}) - \log(\gamma_H) - \log(\gamma_{HCO_3}) - \log(k_1) \quad (S19)$$

$$\Delta \log(K_2) = \log(\gamma_{HCO_3}) - \log(\gamma_H) - \log(\gamma_{CO_3}) - \log(k_2) \quad (S20)$$

$$\Delta \log(K_s) = -\log(\gamma_{CO_3}) - \log(\gamma_{Ca}) - \log(k_s) \quad (S21)$$

Some results of these calculations are presented in Figure S1. When sulfate ions are replaced by bicarbonate ions, the ionic strength of the solution is diminished and, therefore, the activity coefficients of ions are increased. Coevally, the specific interactions between calcium and bicarbonate ions are enhanced due to the increase in bicarbonate concentrations. Because of these opposing effects, the solubility of calcium carbonate minerals changes only insignificantly upon sulfate reduction. In contrast, sulfate concentrations have a strong effect on the first and second stoichiometric dissociation constant of carbonic acid due to the strong association between hydrogen and sulfate ions. With decreasing temperature the association becomes weaker and changes in the  $\Delta \log K$  are diminished. A decrease in dissolved Ca and Mg concentrations, as induced by carbonate precipitation processes, causes a decrease in the stoichiometric dissociation constants of carbonic acid and the ionic products of calcium carbonate (Fig. 2). The effect is caused by the diminished ionic strength of the pore fluids altered by carbonate precipitation.

The results of our simulations were fitted using the following equations:

$$\begin{aligned} \Delta \log(K_1) = & (0.0014566 \cdot Cl - [SO_4]) \cdot [-144.188 + 1.10614 \cdot T - 0.00216 \cdot T^2 + \\ & (4.7793 - 0.034532 \cdot T + 0.00006366 \cdot T^2) \cdot Cl] + (0.0032833 \cdot Cl - [Mg] - [Ca]) \times \\ & (-2.444 - 0.01688 \cdot T + (3.689 + 0.01271 \cdot T) \cdot Cl^{1/2} / (1 + Cl^{1/2})) \end{aligned} \quad (S22)$$

$$\begin{aligned} \Delta \log(K_2) = & (0.0014566 \cdot Cl - [SO_4]) \cdot [-141.594 + 1.09368 \cdot T - 0.002149 \cdot T^2 + \\ & (3.9943 - 0.02936 \cdot T + 0.00005497 \cdot T^2) \cdot Cl] + (0.0032833 \cdot Cl - [Mg] - [Ca]) \times \\ & \{128.139 - 30.411 \cdot \ln(T) + [-157.692 + 36.570 \cdot \ln(T)] \cdot Cl^{1/2} / (1 + Cl^{1/2})\} + \\ & (0.0032833 \cdot Cl - [Mg] - [Ca])^2 \cdot \{4042.88 - 787.32 \cdot \ln(T) + [-4689.1 + \\ & 908.44 \cdot \ln(T)] \cdot Cl^{1/2} / (1 + Cl^{1/2})\} \end{aligned} \quad (S23)$$

$$\begin{aligned} \Delta \log(K_s) = & (0.0032833 \cdot Cl - [Mg] - [Ca]) \cdot \{157.55 - 37.817 \cdot \ln(T) + \\ & [-187.70 + 44.197 \cdot \ln(T)] \cdot Cl^{1/2} / (1 + Cl^{1/2})\} + (0.0032833 \cdot Cl - [Mg] - [Ca])^2 \times \\ & \{5778.6 - 1165.47 \cdot \ln(T) + [-6836.8 + 1376.21 \cdot \ln(T)] \cdot Cl^{1/2} / (1 + Cl^{1/2})\} \end{aligned} \quad (S24)$$

In relations (22S)–(24S),  $T$  is the temperature on the Kelvin scale,  $Cl$  is chlorinity expressed as a mass fraction in ‰ and  $[SO_4]$ ,  $[Mg]$  and  $[Ca]$  are the concentrations of sulfate, magnesium, and calcium in mol/kg-sw, “molinity” [7].

These equations can be used to determine the  $\log K$  values for any anoxic pore water sample given the concentrations of dissolved sulfate, Mg and Ca. Subsequently, the concentration constants for the carbonate system in anoxic porewaters ( $K_{pw}^*$ ) can be calculated as the sum of the concentration constants valid for seawater ( $K_{sw}^*$ ) and the  $\log K$  values:

$$\log(K_{1pw}^*) = \log(K_{1sw}^*) + \Delta \log(K_1) \quad (S25)$$

$$\log(K_{2pw}^*) = \log(K_{2sw}^*) + \Delta \log(K_2) \quad (S26)$$

$$\log(IP_{pw}^*) = \log(IP_{sw}^*) + \Delta \log(K_s) \quad (S27)$$

Where “IP” means Ionic Product. With these new constants, it is now possible to calculate reliable pH values and other parameters of the carbonate system in anoxic pore fluids and seawater with anomalous concentrations of sulfate, alkalinity, and alkaline earth metals.

Alteration of the composition of pore water would change not only the constants of the carbonate system at pressure 1 atmosphere but also their pressure dependence. However, we consider this effect to be of secondary order, and in further calculations of the carbonate system at in situ pressure, we will carry out the procedure as is generally accepted for seawater [1] without any consideration of the effect variation of composition pore water on the pressure dependence of the constants.

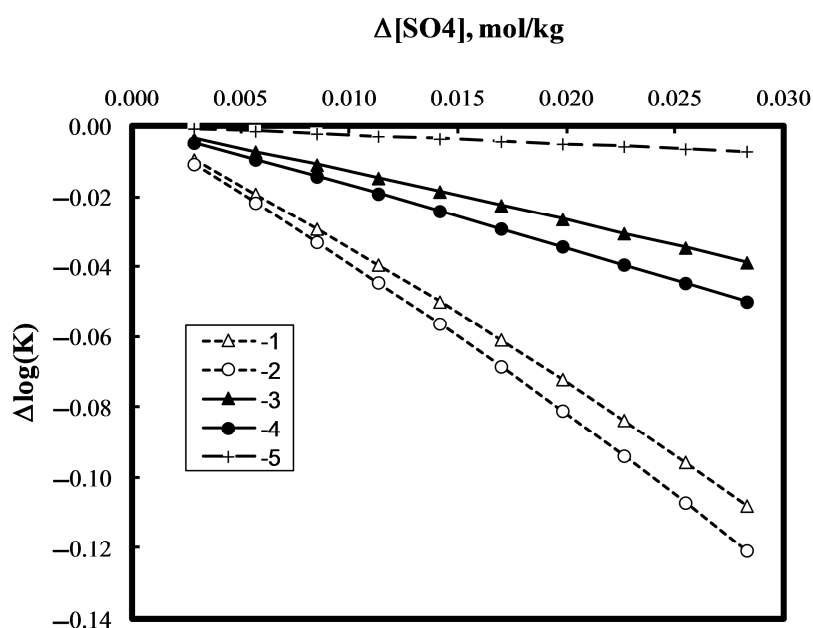

**Figure S1.** Effect of sulfate reduction (decreasing sulfate concentrations and increasing carbonate alkalinity) on the stability constants of the carbonate system in seawater (salinity = 35). Symbols indicate changes in the logarithm of the first dissociation constant (1,3) and the second dissociation constant (2,4) at 25°C and 0°C, respectively; 5 – changes in  $\log(K_s)$  at 0°C.

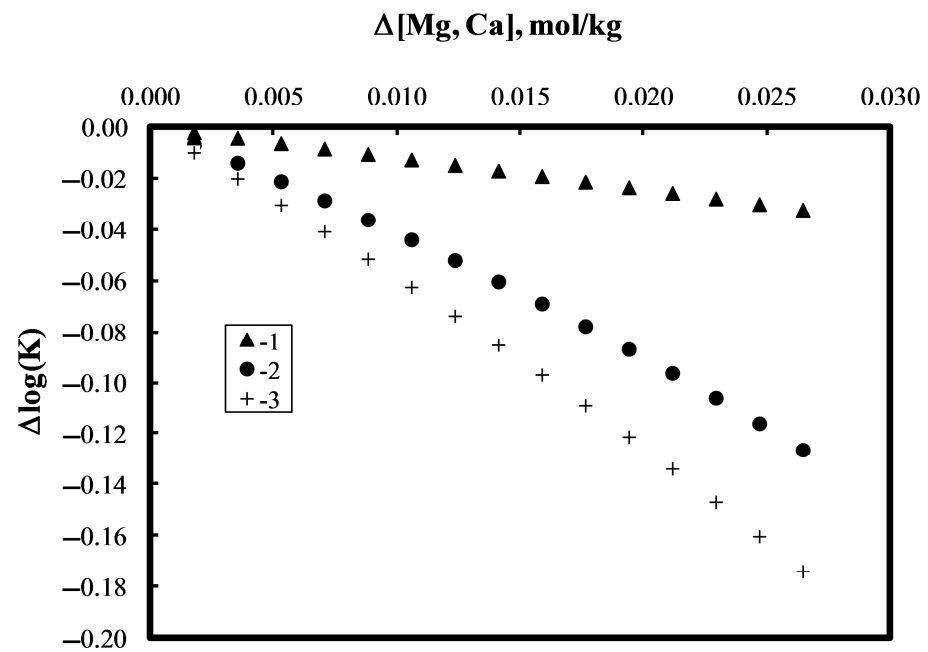

**Figure S2.** Effect of carbonate precipitation (decreasing calcium, magnesium, and carbonate alkalinity) on the stability constants of the carbonate system in seawater (salinity = 35, temperature = 0°C). Symbols indicate changes in the logarithm of the first (1) and the second (2) dissociation constants and solubility of calcium carbonate (3).

**Table S3.** The composition of seawater at S=35.

| Salt                            | Molality |
|---------------------------------|----------|
| NaCl                            | 0.42522  |
| Na <sub>2</sub> SO <sub>4</sub> | 0.02927  |
| KCl                             | 0.01058  |
| NaHCO <sub>3</sub>              | 0.00240  |
| CaCl <sub>2</sub>               | 0.01074  |
| MgCl <sub>2</sub>               | 0.05475  |

**Table S4.** References of Pitzer parameters which take into account interactions between cations and anions for individual electrolyte solutions used in the modeling calculations.

| Cation (i) | anion(j)         | Ref. | Cation | Anion            | Ref. |
|------------|------------------|------|--------|------------------|------|
| Ca         | SO <sub>4</sub>  | [5]  | Mg     | Cl               | [22] |
| Ca         | HCO <sub>3</sub> | [5]  | Mg     | SO <sub>4</sub>  | [23] |
| Na         | SO <sub>4</sub>  | [6]  | Mg     | HCO <sub>3</sub> | [24] |
| H          | Cl               | [9]  | K      | Cl               | [25] |
| Na         | Cl               | [19] | K      | SO <sub>4</sub>  | [26] |
| Na         | HCO <sub>3</sub> | [20] | K      | HCO <sub>3</sub> | [27] |
| Na         | CO <sub>3</sub>  | [21] | Ca     | Cl               | [28] |
| K          | CO <sub>3</sub>  | [21] | -      | -                | -    |

**Table S5.** References of Pitzer parameters which take into account interactions in ternary electrolyte solutions (i, j, k – pèces) used in the modeling calculations.

| (i)              | (j)              | (k)             | Ref. | (i)              | (j)              | (k)             | Ref. |
|------------------|------------------|-----------------|------|------------------|------------------|-----------------|------|
| K                | HCO <sub>3</sub> | Cl              | [5]  | H                | Ca               | Cl              | [8]  |
| Na               | K                | CO <sub>3</sub> | [5]  | HCO <sub>3</sub> | Cl               | Na              | [20] |
| CO <sub>3</sub>  | HCO <sub>3</sub> | K               | [5]  | Na               | CO <sub>3</sub>  | Cl              | [21] |
| Na               | HCO <sub>3</sub> | K               | [5]  | CO <sub>3</sub>  | SO <sub>4</sub>  | Na              | [21] |
| H                | K                | Cl              | [5]  | Na               | Cl               | CO <sub>2</sub> | [29] |
| H                | K                | SO <sub>4</sub> | [5]  | Na               | SO <sub>4</sub>  | CO <sub>2</sub> | [30] |
| HCO <sub>3</sub> | Cl               | Mg              | [5]  | K                | Cl               | CO <sub>2</sub> | [30] |
| HCO <sub>3</sub> | SO <sub>4</sub>  | Na              | [5]  | K                | SO <sub>4</sub>  | CO <sub>2</sub> | [30] |
| HCO <sub>3</sub> | SO <sub>4</sub>  | Mg              | [5]  | Mg               | Cl               | CO <sub>2</sub> | [30] |
| CO <sub>3</sub>  | SO <sub>4</sub>  | K               | [5]  | Mg               | SO <sub>4</sub>  | CO <sub>2</sub> | [30] |
| CO <sub>3</sub>  | HCO <sub>3</sub> | Na              | [5]  | Ca               | Cl               | CO <sub>2</sub> | [30] |
| H                | Na               | Cl              | [8]  | H                | Cl               | CO <sub>2</sub> | [31] |
| H                | Na               | SO <sub>4</sub> | [8]  | Na               | HCO <sub>3</sub> | CO <sub>2</sub> | [31] |
| H                | Mg               | Cl              | [8]  | -                | -                | -               | -    |

## References

1. Millero, F.J. Thermodynamics of the carbon dioxide system in the oceans. *Geochim. Cosmochim. Acta* **1995**, *59*, 661–677. [https://doi.org/10.1016/0016-7037\(94\)00354\\_2](https://doi.org/10.1016/0016-7037(94)00354_2)
2. Dickson, A.G.; Millero, F.J. A comparison of the equilibrium constants for the dissociation of carbonic acid in seawater media: *Deep-Sea Res.* **1987**, *34*, 1733–1743.
3. Ben-Yaakov, S.; Goldhaber, M.B. The influence of sea water composition on the apparant constants of the carbonate system: *Deep-Sea Res.* **1973**, *20*, 87–99.
4. Pytkowicz, R.M. Activity coefficients of bicarbonates and carbonates in seawater. *Limnol. Oceanogr.* **1975**, *20*, 971–975.
5. Harvie, C.E.; Moller, N.; Weare, J.H.; The prediction of mineral solubilities in natural waters: The Na-K-Mg-Ca-H-Cl-SO<sub>4</sub>-OH-HCO<sub>3</sub>-CO<sub>3</sub>-CO<sub>2</sub>-H<sub>2</sub>O system to high ionic strengths at 25 °C. *Geochim. Cosmochim. Acta* **1984**, *48*, 723–751.
6. Pabalan, R.T.; Pitzer, K.S. Thermodynamics of concentrated electrolyte mixtures and the prediction of mineral solubilities to high temperatures in the Na-K-Mg-Cl-SO<sub>4</sub>-OH-H<sub>2</sub>O. *Geochim. Cosmochim. Acta* **1987**, *51*, 2429–2443.
7. Clegg, S.L.; Whitfield, M. Activity coefficients in natural waters. In *Activity Coefficients in Electrolyte Solutions*; CRC Press: Boca Raton, FL, USA; Ann Arbor, MI, USA; Boston, MA, USA; London, UK, 1991; pp. 279–434.
8. Millero, F.J.; Pierrot, D. A chemical model for natural waters. *Aquat. Geochem.* **1998**, *4*, 153–199.
9. Pitzer, K.S. Thermodynamics of electrolytes. I Theoretical basis and general equation. *J. Phys. Chem.* **1973**, *77*, 268–277.
10. Pitzer, K.S. Ionic interaction approach: Theory and data correlation. In *Activity Coefficients in Electrolyte Solutions*, 2nd ed.; Pitzer, K.S., Ed.; CRC Press: Boca Raton, FL, USA; Ann Arbor, MI, USA; Boston, MA, USA; London, UK, 1991; pp. 75–153.
11. Whitfield, M. The extension of chemical models for sea water to include trace components at 25 C and 1 atm pressure. *Geochim. Cosmochim. Acta* **1975**, *39*, 1545–1557.
12. Pitzer, K.S.; Silvester, L.F. Thermodynamics of electrolytes. VI. Weak electrolytes including H<sub>3</sub>PO<sub>4</sub>. *J. Soln. Chem.* **1976**, *5*, 269–278.
13. Dickson, A.G. Standard potential of the reaction: AgCl(s)+1/2H<sub>2</sub>(g)=Ag(s)+HCl(aq), and the standard acidity constant of the ion HSO<sub>4</sub><sup>-</sup> in synthetic seawater from 273.15 to 318.15 K. *J. Chem. Thermodyn.* **1990**, *22*, 113–127.
14. Plummer, L.N.; Busenberg, E. The solubility of calcite, aragonite and vaterite in CO<sub>2</sub>-H<sub>2</sub>O solutions between 0 and 90 C, and an evaluation of the aqueous model for the system CaCO<sub>3</sub>-CO<sub>2</sub>-H<sub>2</sub>O. *Geochim. Cosmochim. Acta* **1982**, *46*, 1011–1040.
15. Berner, R.A. *Early Diagenesis—A Theoretical Approach*; Princeton; Princeton University Press: Princeton, NJ, USA, 1980; 241p.
16. Drever, J.I. *The Magnesium Problem, in The Sea*; Goldberg, E.D., Ed.; John Wiley & Sons: New York, NY, USA; London, UK; Sydney, Australia; Toronto, ON, Canada, 1974; Volume 5, pp. 337–357.
17. Gieskes, J.M. The chemistry of interstitial waters of deep sea sediments: Interpretation of deep sea drilling data. In *Chemical Oceanography*; Riley, J.P., Chester, R., Eds.; Academic Press: London, UK; New York, NY, USA, 1983; Volume 8, pp. 222–269.
18. Aloisi, G.; Wallmann, K.; Bollwerk, S.M.; Derkachev, A.; Bohrmann, G.; Suess, E. The effect of dissolved barium on biogeochemical processes at cold seeps. *Geochim. Cosmochim. Acta* **2004**, *68*, 1735–1748.
19. Pitzer, K.S.; Peiper, J.C.; Busey, R.H. Thermodynamic properties of aqueous sodium chloride solutions. *J. Phys. Chem. Ref. Data* **1984**, *13*, 1–102.
20. Peiper, J.C.; Pitzer, K.S. Thermodynamics aqueous carbonate solutions including mixtures of sodium carbonate, bicarbonate and chloride. *J. Chem. Thermodyn.* **1982**, *14*, 613–638.

21. Marion, G.M. Carbonate mineral solubility at low temperatures in the Na-K-Mg-Ca-Cl-H-SO<sub>4</sub>-OH-HCO<sub>3</sub>-CO<sub>3</sub>-CO<sub>2</sub>-H<sub>2</sub>O system: *Geochim. Cosmochim. Acta* **2001**, *65*, 1883–1896.
22. De Lima, M.C.P.; Pitzer, K.S. Thermodynamics of saturated electrolyte mixtures of NaCl with Na<sub>2</sub>SO<sub>4</sub> and MgCl<sub>2</sub>. *J. Soln. Chem.* **1983**, *12*, 187–201.
23. Phutela, R.C.; Pitzer, K.S. Heat capacity and other thermodynamic properties of aqueous magnesium sulfates. *J. Phys. Chem.* **1986**, *90*, 895–901.
24. Pitzer, K.S.; Olsen, J.; Simonson, J.M.; Roy, R.N.; Gibbons, J.J.; Rowe, L. Thermodynamics of magnesium and calcium bicarbonates and mixtures with chloride. *J. Chem. Eng. Data* **1985**, *30*, 14–17.
25. Holmes, H.F.; Mesmer, R.E. Thermodynamic properties of aqueous solutions of the alkali metal chlorides to 250 °C. *J. Phys. Chem.* **1983**, *87*, 1242–1254.
26. Holmes, H.F.; Mesmer, R.E. Thermodynamics of aqueous solutions of the alkali metal sulfates. *J. Soln. Chem.* **1986**, *15*, 495–518.
27. Roy, R.N.; Gibbons, J.J.; Wood, M.D.; Williams, R.W. The first ionization of carbonic acid in aqueous solutions of potassium chloride including the activity coefficients of potassium bicarbonate. *J. Chem. Thermodyn.* **1983**, *15*, 37–47.
28. Greenberg, J.P.; Moller, N. The prediction of mineral solubilities in natural waters. A chemical equilibrium model for the Na-K-Ca-SO<sub>4</sub>-H<sub>2</sub>O system to high concentration from 0 to 250 °C. *Geochim. Cosmochim. Acta* **1989**, *53*, 2503–2518.
29. Harned, H.; Davis, R. The ionization constant of carbonic acid in water and the solubility of carbon dioxide in water and aqueous salt solutions from 0 to 50°. *J. Am. Chem. Soc.* **1943**, *65*, 2030–2037.
30. He, S.; Morse, J.W.; The carbonic acid system and calcite solubility in aqueous Na-K-Ca-Mg-Cl-SO<sub>4</sub> solutions from 0 to 90 °C. *Geochim. Cosmochim. Acta* **1993**, *57*, 3533–3554.
31. Wong, C.S.; Tishchenko, P.Y.; Johnson, W.K. Solubility of Carbon Dioxide in Aqueous HCl and NaHCO<sub>3</sub> Solutions from 278 to 298 K. *J. Chem. Eng. Data* **2005**, *50*, 817–821.
